# Supplementary material for: Genetic Variation in the Familial Mediterranean Fever Gene (MEFV) and Risk for Crohn's Disease and Ulcerative Colitis
Source: PLoS One. 2009 Sep 28;4(9):e7154. doi: 10.1371/journal.pone.0007154 (PMC2745755; doi:10.1371/journal.pone.0007154)
Supplement: Table S3 — Association results of NLRP3 tagging SNPs in UC sample sets. (0.04 MB DOC) [file pone.0007154.s006.doc]

**Table S3:** Association results of *NLRP3* tagging SNPs in UC sample sets

|  | **Combined Belgian UC1** | | | | **Combined Canadian UC2** | | | | **Combined UC3** | | | |
| --- | --- | --- | --- | --- | --- | --- | --- | --- | --- | --- | --- | --- |
| **SNP** | **Allele4** | **Frequency Cases** | **Frequency Controls** | ***P* value** | **Allele4** | **Frequency Cases** | **Frequency Controls** | ***P* value** | **Allele4** | **Frequency Cases** | **Frequency Controls** | ***P* value** |
| rs4353135 | T | 0.67 | 0.66 | 0.7506 | G | 0.34 | 0.34 | 0.8907 | T | 0.67 | 0.66 | 0.7654 |
| rs4266924 | A | 0.87 | 0.81 | 0.3767 | A | 0.89 | 0.86 | 0.3345 | A | 0.88 | 0.82 | 0.3806 |
| rs55646866 | C | 0.89 | 0.83 | 0.4734 | C | 0.90 | 0.85 | 0.2182 | C | 0.89 | 0.84 | 0.3046 |
| rs6672995 | G | 0.82 | 0.79 | 0.9175 | A | 0.17 | 0.17 | 1.0000 | G | 0.83 | 0.80 | 0.9426 |
| ss107635144 | C | 0.85 | 0.79 | 0.3470 | C | 0.86 | 0.83 | 0.4645 | C | 0.85 | 0.80 | 0.3466 |
| rs10733113 | G | 0.85 | 0.80 | 0.5143 | G | 0.86 | 0.83 | 0.6013 | G | 0.85 | 0.81 | 0.5195 |

1Includes 137 UC trios, 96 UC cases, and 107 healthy controls.

2Includes 91 UC trios.

3Includes 228 UC trios, 96 UC cases, and 107 healthy controls.

4Alleles shown are the alleles seen more frequently in the cases than in the controls.
